# Supplementary material for: Te-induced fabrication of Pt3PdTe0.2 alloy nanocages by the self-diffusion of Pd atoms with unique MOR electrocatalytic performance
Source: Royal Society of Chemistry journal article supplement (doi:10.1039/d2na00576j), 2023-01-01
Supplement: d2na00576j1.pdf [file d2na00576j1.pdf]

## Support information

### Te-induced fabrications of $\text{Pt}_3\text{PdTe}_{0.2}$ alloy nanocages by self-diffusion of Pd atoms with unique MOR electrocatalytic performance

Yuhe Shi,<sup>†,a</sup> Ling Zhang,<sup>†,\*a</sup> Huiwen Zhou,<sup>a</sup> Ruanshan Liu,<sup>a</sup> Shichen Nie,<sup>b</sup>  
Guojie Ye,<sup>c</sup> Fengxia Wu,<sup>d,e</sup> Wenxin Niu,<sup>\*,d,e</sup> Jing Long Han,<sup>\*,f,g</sup> and Ai Jie  
Wang<sup>f,g</sup>

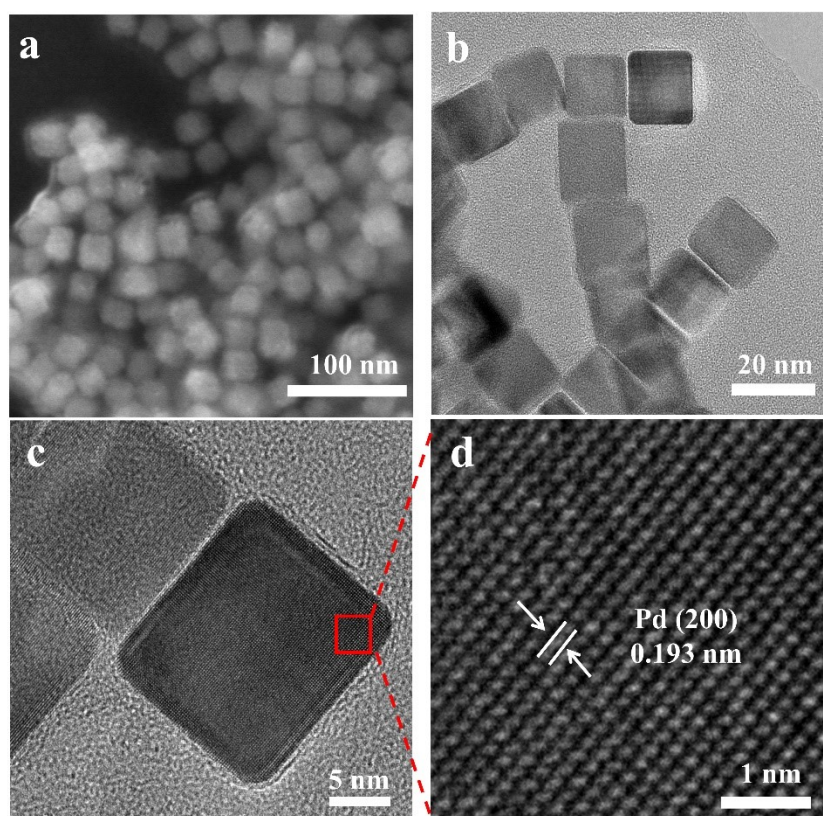

**Fig. S1** SEM (a), TEM (b), and HRTEM (c and d) images of Pd nanocube templates.

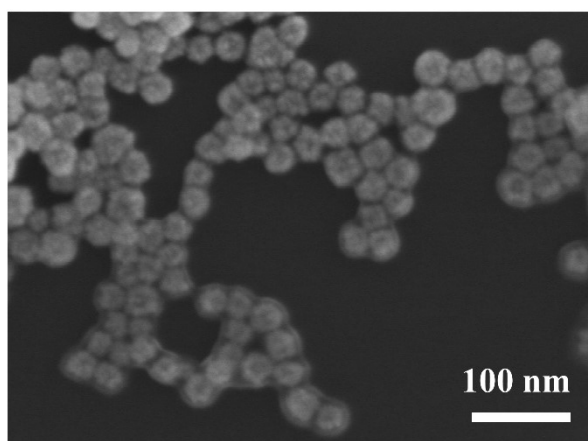

**Fig. S2** SEM image of  $\text{Pt}_3\text{PdTe}_{0.2}$  nanocages.

**Table S1** Components ( $\text{mg}\cdot\text{L}^{-1}$ ) of Pt, Pd, and Te elements of  $\text{Pt}_3\text{PdTe}_x$  as-products in synthetic solutions calculated from ICP-OES data.

| As-products                     | Pt                            | Pd  | Te   |
|---------------------------------|-------------------------------|-----|------|
|                                 | $\text{mg}\cdot\text{L}^{-1}$ |     |      |
| $\text{Pt}_3\text{PdTe}_{0.2}$  | 16.9                          | 3.0 | 0.84 |
| $\text{Pt}_3\text{PdTe}_{0.35}$ | 14.8                          | 2.7 | 1.1  |
| $\text{Pt}_3\text{PdTe}_{0.4}$  | 15.2                          | 2.5 | 1.2  |
| $\text{Pd}@Pt$                  | 4.3                           | 2.8 | –    |
| $\text{PtPd}_{1.5}$             | 10.7                          | 7.9 | –    |

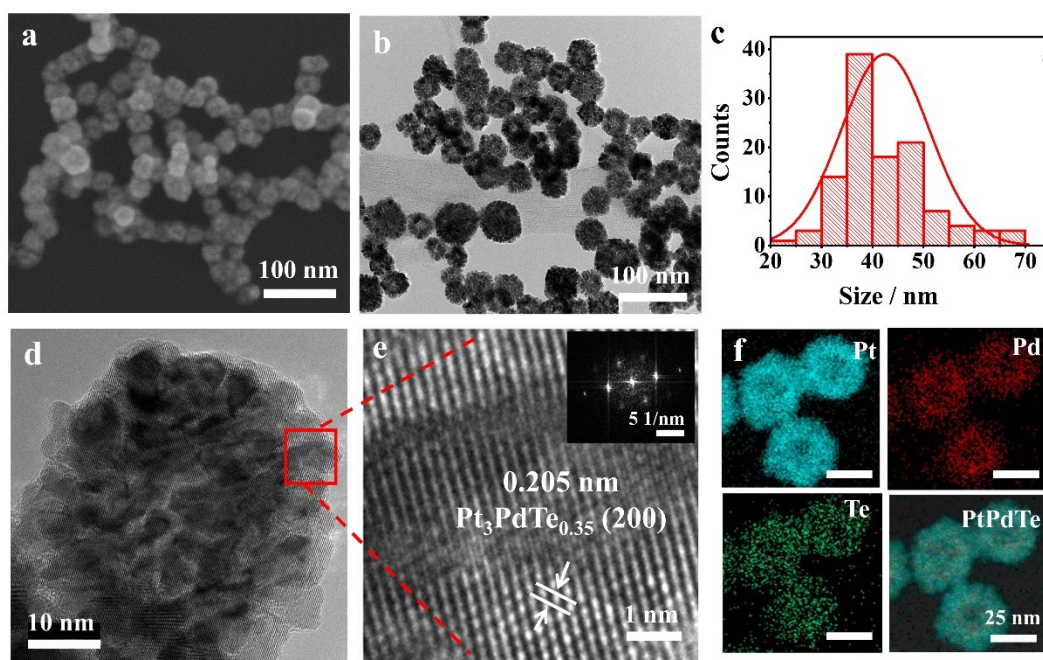

**Fig. S3** SEM image (a), TEM image (b), size distribution (c), HRTEM images (d and e), and EDS elemental mappings (f) of Pt<sub>3</sub>PdTe<sub>0.35</sub> nanocages. Inset of (e), corresponding FFT pattern.

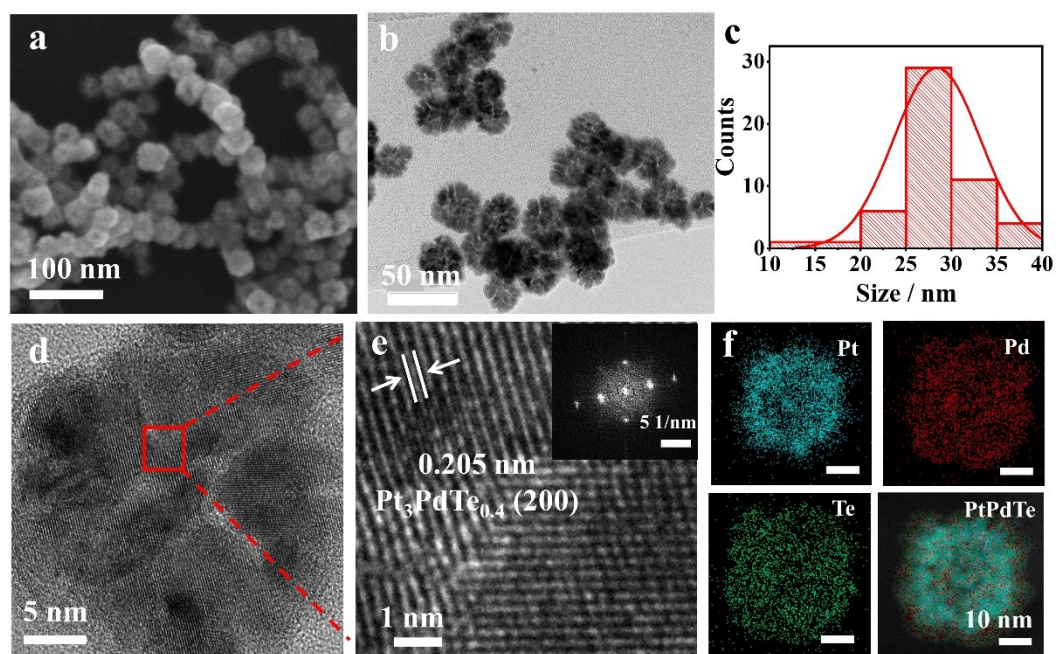

**Fig. S4** SEM image (a), TEM image (b), size distribution (c), HRTEM images (d and e), and EDS elemental mappings (f) of Pt<sub>3</sub>PdTe<sub>0.4</sub> nanocages. Inset of (e), corresponding FFT pattern.

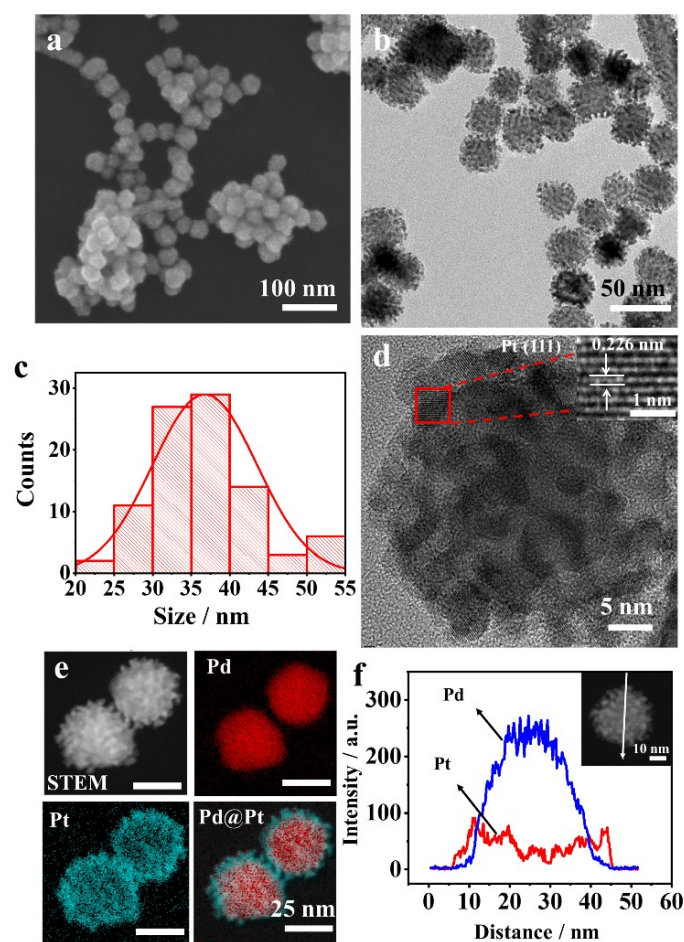

**Fig. S5** SEM image (a), TEM image (b), size distribution (c), HRTEM image (d), STEM and EDS elemental mapping images (e) of Pd@Pt core-shell nanoparticles. Inset of (d), HRTEM of the labeled zone in (d). (f) Elemental linear-scan profile across the white arrow of the individual Pd@Pt core-shell nanoparticle (inset).

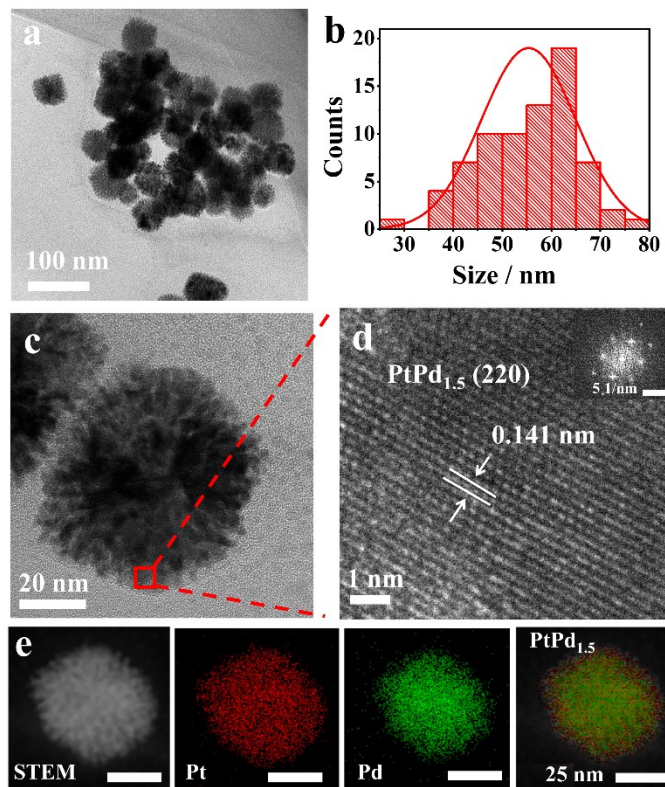

**Fig. S6** TEM image (a), size distribution (b), HRTEM images (c and d), STEM and EDS elemental mapping images (e) of PtPd<sub>1.5</sub> alloy nanoparticles. Inset of (d), corresponding FFT pattern.

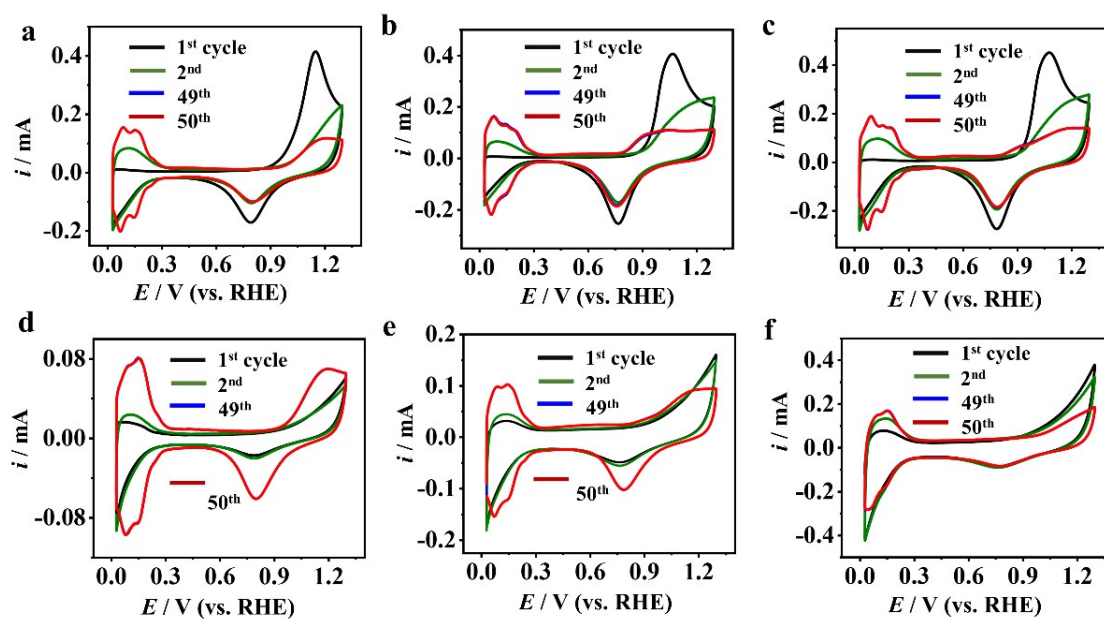

**Fig. S7** CVs of  $\text{Pt}_3\text{PdTe}_{0.2}$  (a),  $\text{Pt}_3\text{PdTe}_{0.35}$  (b),  $\text{Pt}_3\text{PdTe}_{0.4}$  (c),  $\text{PtPd}_{1.5}$  (d),  $\text{Pd@Pt}$  (e), and  $\text{Pt/C}$  (f) catalysts modified GCE at 1<sup>st</sup>, 2<sup>nd</sup>, 49<sup>th</sup>, and 50<sup>th</sup> cycles in 0.5 M  $\text{H}_2\text{SO}_4$ .

Scanning rates,  $50 \text{ mV}\cdot\text{s}^{-1}$ .

**Table S2** Weight percentages (%) of Pt, Pd, and Te elements of  $\text{Pt}_3\text{PdTe}_x$  as-products before and after the electrochemical activations and MOR durability tests in  $\text{H}_2\text{SO}_4$  by TEM-EDS methods.

| as-products                     | Before activations |       |       | After activations |       |      | After durability |      |      |
|---------------------------------|--------------------|-------|-------|-------------------|-------|------|------------------|------|------|
|                                 | Pt                 | Pd    | Te    | Pt                | Pd    | Te   | Pt               | Pd   | Te   |
| $\text{Pt}_3\text{PdTe}_{0.2}$  | 92.17              | 4.79  | 3.04  | 90.45             | 8.78  | 0.78 | 90.44            | 8.78 | 0.79 |
| $\text{Pt}_3\text{PdTe}_{0.35}$ | 88.37              | 7.14  | 4.54  | 89.26             | 9.6   | 1.18 | —                | —    | —    |
| $\text{Pt}_3\text{PdTe}_{0.4}$  | 70.65              | 12.23 | 17.12 | 77.12             | 17.27 | 5.63 | —                | —    | —    |

Table S3. Maximum specific activities and mass activities of in the backward ( $j_b$ ) and forward scan ( $j_f$ ) and the ratio of  $j_b$  to  $j_f$  ( $I_b/I_f$ ).

| catalysts                       | $j_b$                          |                               | $j_f$                          |                               | $I_b/I_f$ |
|---------------------------------|--------------------------------|-------------------------------|--------------------------------|-------------------------------|-----------|
|                                 | $\text{mA}\cdot\text{cm}^{-2}$ | $\text{A}\cdot\text{mg}^{-1}$ | $\text{mA}\cdot\text{cm}^{-2}$ | $\text{A}\cdot\text{mg}^{-1}$ |           |
| $\text{Pt}_3\text{PdTe}_{0.2}$  | 2.71                           | 2.14                          | 1.96                           | 1.42                          | 1.4       |
| $\text{Pt}_3\text{PdTe}_{0.35}$ | 2.36                           | 1.85                          | 1.57                           | 1.13                          | 1.5       |
| $\text{Pt}_3\text{PdTe}_{0.4}$  | 1.65                           | 0.98                          | 1.25                           | 0.71                          | 1.3       |
| $\text{Pd@Pt}$                  | 1.11                           | 0.91                          | 0.92                           | 0.74                          | 1.2       |
| $\text{PtPd}_{1.5}$             | 0.58                           | 0.16                          | 0.54                           | 0.15                          | 1.1       |
| $\text{Pt/C}$                   | 0.24                           | 0.18                          | 0.25                           | 0.20                          | 0.95      |

**Table S4.** Summary of reported catalytic performance of various Pt-based MOR catalysts in acidic electrolytes.

| Catalysts                           | Electrolyte                                                        | Mass activity<br>( $\text{A}\cdot\text{mg}^{-1}_{\text{Pt+Pd}}$ ) | Specific activity<br>( $\text{mA}\cdot\text{cm}^{-2}$ ) | Ref.         |
|-------------------------------------|--------------------------------------------------------------------|-------------------------------------------------------------------|---------------------------------------------------------|--------------|
| Pt <sub>3</sub> PdTe <sub>0.2</sub> | 0.1 M HClO <sub>4</sub> ,<br>1 M CH <sub>3</sub> OH                | 2.14                                                              | 2.71                                                    | This<br>work |
| PdPtRuTe<br>nanotubes               | 0.5 M H <sub>2</sub> SO <sub>4</sub> ,<br>1.0 M CH <sub>3</sub> OH | 1.262                                                             | 2.96                                                    | 1            |
| PtPdTe<br>nanowires                 | 1 M CH <sub>3</sub> OH,<br>0.5 M H <sub>2</sub> SO <sub>4</sub>    | –                                                                 | 1.49                                                    | 2            |
| PtTe<br>nanotubes                   | 0.5 M H <sub>2</sub> SO <sub>4</sub> ,<br>0.5 M CH <sub>3</sub> OH | 0.632                                                             | 1.149                                                   | 3            |
| TePbPt<br>nanotube                  | 0.5 M H <sub>2</sub> SO <sub>4</sub> ,<br>1 M CH <sub>3</sub> OH   | 0.53                                                              | –                                                       | 4            |
| PtIrTe<br>nanotubes                 | 0.5 M H <sub>2</sub> SO <sub>4</sub> ,<br>1.0 M CH <sub>3</sub> OH | 0.495                                                             | –                                                       | 5            |
| PdRuPt<br>nanowires                 | 0.1 M HClO <sub>4</sub> ,<br>0.5 M CH <sub>3</sub> OH              | 1.10                                                              | 1.98                                                    | 6            |
| PtRu<br>nanowires                   | 0.1 M HClO <sub>4</sub> ,<br>0.5 M CH <sub>3</sub> OH              | 0.82                                                              | 1.16                                                    | 7            |
| hollow Pt-on-Pd<br>nanodendrites    | 0.5 M H <sub>2</sub> SO <sub>4</sub> ,<br>1.0 M CH <sub>3</sub> OH | 0.58                                                              | 1.36                                                    | 8            |
| PtPdCu                              | 0.5 M H <sub>2</sub> SO <sub>4</sub> ,<br>0.5 M CH <sub>3</sub> OH | 0.52                                                              | 0.693                                                   | 9            |



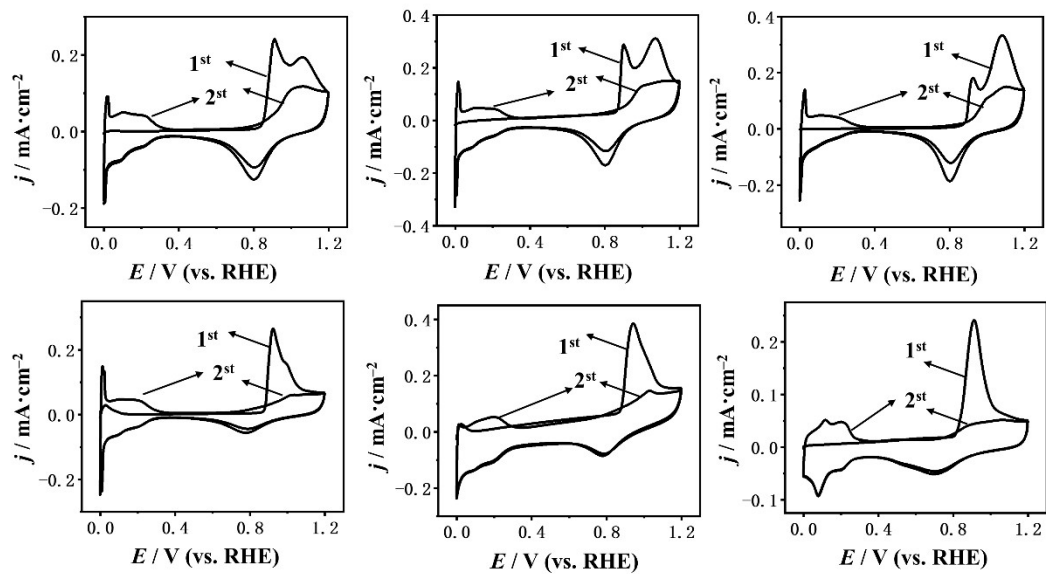

Fig. S8 CO stripping curves for 1<sup>st</sup> and 2<sup>nd</sup> cycles of different catalysts in 0.5 M H<sub>2</sub>SO<sub>4</sub>. Scanning rates, 50 mV s<sup>-1</sup>.

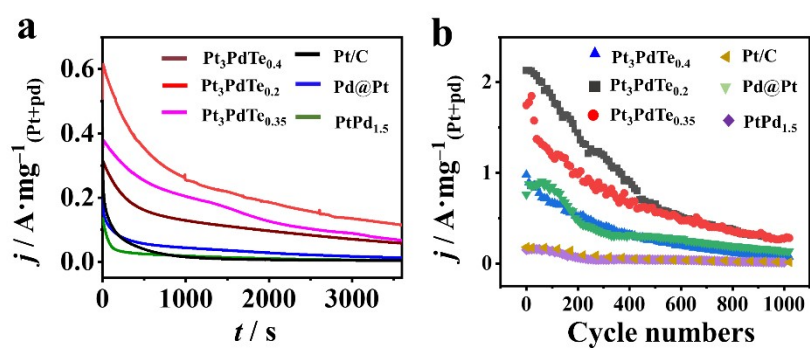

Fig. S9 Durability tests of electrocatalysts towards electrooxidations of 1 M methanol in 0.1 M HClO<sub>4</sub> according to chronoamperometry curves at 0.76 V for 3600 s (a) and peaked mass activities in the backward scans in continuous CVs at 50 mV·s<sup>-1</sup> (b).

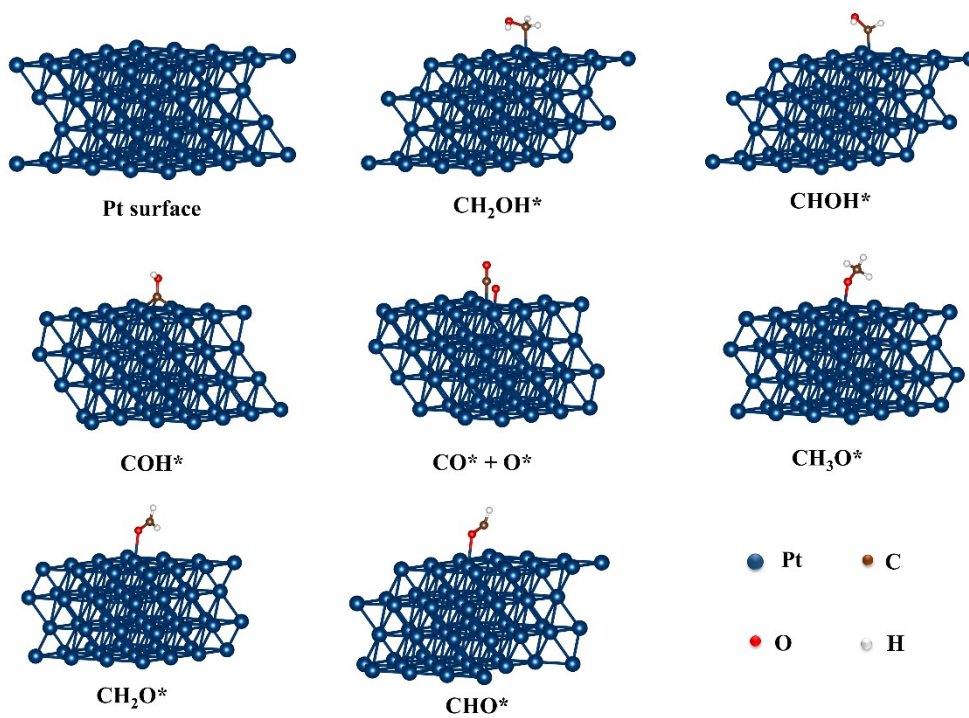

Fig. S10 Configurations of Pt and the intermediates.

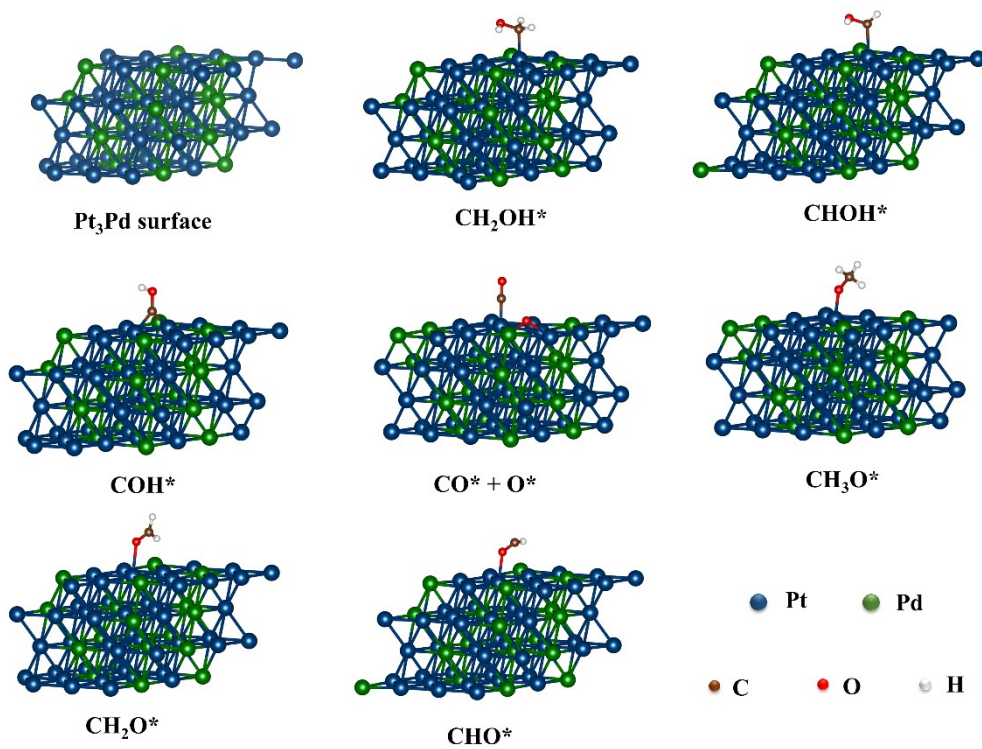

Fig. S11 Configurations of  $\text{Pt}_3\text{Pd}$  and the intermediates.

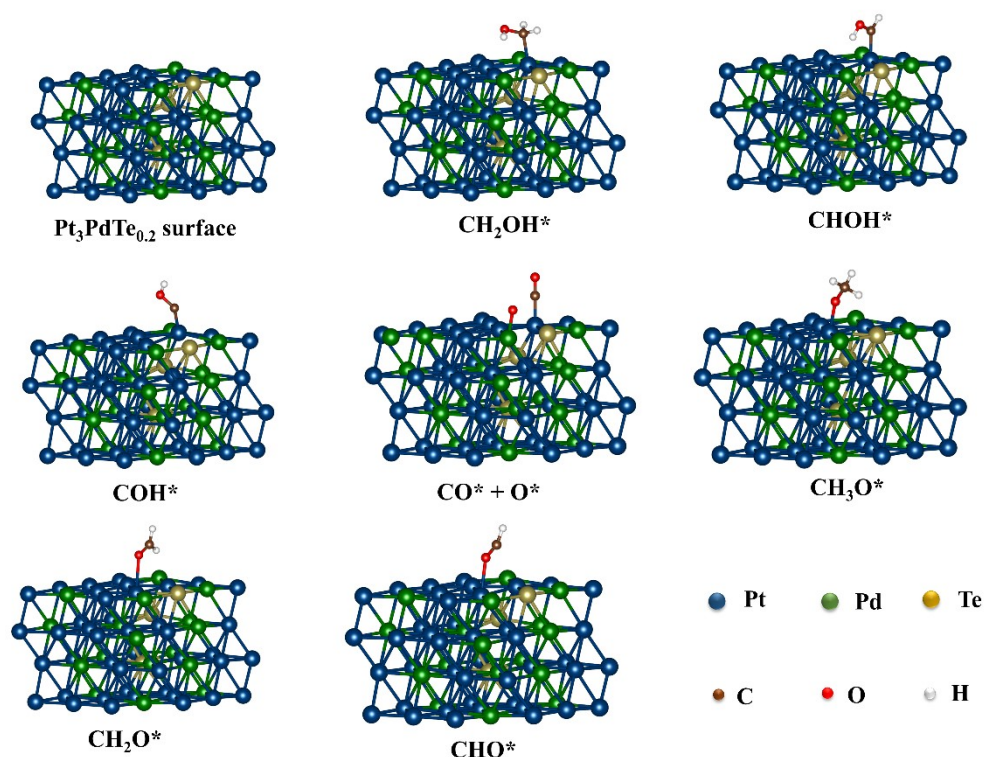

**Fig. S12** Configurations of Pt<sub>3</sub>PdTe<sub>0.2</sub> and the intermediates.

## References

1. S. Y. Ma, H. H. Li, B. C. Hu, X. Cheng, Q. Q. Fu and S. H. Yu, *J. Am. Chem. Soc.*, 2017, **139**, 5890-5895.
2. H.-H. Li, S. Zhao, M. Gong, C.-H. Cui, D. He, H.-W. Liang, L. Wu and S.-H. Yu, *Angew. Chem. Int. Ed.*, 2013, **52**, 7472-7476.
3. Z. Wang, H. Zhang, S. Yin, S. Liu, Z. Dai, Y. Xu, X. Li, L. Wang and H. Wang, *Sustain. Energy Fuels*, 2020, **4**, 2950-2955.
4. L. Yang, G. Li, J. Ge, C. Liu, Z. Jin, G. Wang and W. Xing, *J. Mater. Chem. A*, 2018, **6**, 16798-16803.
5. Y. Hao, Y. Yang, L. Hong, J. Yuan, L. Niu and Y. Gui, *ACS Appl. Mater. Interfaces*, 2014, **6**, 21986-21994.
6. C. Shang, Y. Guo and E. Wang, *Nano Res.*, 2018, **11**, 4348-4355.
7. L. Huang, X. Zhang, Q. Wang, Y. Han, Y. Fang and S. Dong, *J. Am. Chem. Soc.*, 2018, **140**, 1142-1147.
8. L. Wang and Y. Yamauchi, *J. Am. Chem. Soc.*, 2013, **135**, 16762-16765.
9. P. Wang, Y. Zhang, R. Shi and Z. Wang, *ACS Appl. Energy Mater.*, 2019, **2**, 2515-2523.
